# Supplementary material for: Postprandial metabolomics: GC-MS analysis reveals differences in organic acid profiles of impaired fasting glucose individuals in response to highland barley loads
Source: Royal Society of Chemistry journal article supplement (doi:10.1039/c8fo02321b), 2019-01-01
Supplement: c8fo02321b1.pdf [file c8fo02321b1.pdf]

Supplementary Table

Table S1. The characteristics of three test loads.

|                             | GL Load | WR Load | HB Load |
|-----------------------------|---------|---------|---------|
| Energy each load            |         |         |         |
| Kal                         | 307.5   | 307.5   | 307.5   |
| KJ                          | 1286    | 1286    | 1286    |
| Total mass (g/test load)    | 75      | 89.7    | 100.2   |
| Macronutrient composition   |         |         |         |
| Protein (g)                 | -       | 7.4     | 10.0    |
| Fat (g)                     | -       | 0.8     | 1.0     |
| Carbohydrate (g)            | 75      | 76.5    | 64.5    |
| β-glucan(g)                 | -       | 0.75    | 6.42    |
| Insoluble dietary fiber (g) | -       | 0.7     | 8.7     |
| Glycemic index              | 100     | 83 ± 5  | 35 ± 4  |

Table S2. The insulin resistance index and sensitivity index of IFG participants in the study 2.

|         | HB            | WR         | GL        |
|---------|---------------|------------|-----------|
| HOMR-IR | 2.88±1.89     | 2.8±1.54   | 2.23±1.35 |
| ISI     | 54.2±8.43**†† | 41.5±4.37* | 36.9±5.43 |

Note. Data are mean ± SD. HOMR-IR: Homeostasis model assessment of insulin resistance; ISI: insulin sensitivity index. HB: Highland barley; WR: White rice; GL: Glucose. \* p < 0.05, \*\* p < 0.001, HB or WR vs. GL loads. †† p < 0.001, HB vs. WR loads.

**Table S3.**Concentrations of serum lipids in the fasting state and 2h after ingestion of three test loads in the IFG group.

|    | HDL-C(mmol/L) |           | LDL-C(mmol/L) |            | TG(mmol/L) |           | TC(mmol/L) |            |
|----|---------------|-----------|---------------|------------|------------|-----------|------------|------------|
|    | 0 min         | 120 min   | 0 min         | 120 min    | 0 min      | 120 min   | 0 min      | 120 min    |
| HB | 1.12±0.33     | 1.12±0.35 | 4.03±0.7      | 3.35±0.54* | 2.07±1.29  | 1.49±1.33 | 5.33±0.66  | 3.88±1.78* |
| WR | 1.21±0.33     | 1.48±0.46 | 4.42±0.82     | 3.94±0.47  | 2.29±1.42  | 1.67±0.85 | 5.98±0.99  | 4.97±0.7   |
| GL | 1.11±0.32     | 1.01±0.29 | 4.06±0.64     | 3.57±0.52  | 3.12±2.5   | 2.62±1.73 | 5.67±0.91  | 5.67±0.91  |

*Note.* Data are mean ± SD. TG: Triglycerides; TC: Total cholesterol; HDL-C: High density lipoprotein cholesterol; LDL-C: Low density lipoprotein cholesterol. HB: Highland barley; WR: White rice; GL: Glucose.\*  $p < 0.05$ , 2h after ingestion of three test loads compared with fasting state in the IFG group.

## Supplementary Method

### Materials, reagents and chemicals

Organic acid standards :  $\alpha$ -hydroxybutyrate,  $\beta$ -hydroxybutyrate, 2-hydroxyisocaproic acid, cis-Aconitic acid, citrate, fumarate, glutaric acid, glycolic acid, lactate, malate, malonic acid, ethylmalonic acid, oxalic acid, oxaloacetate, pimelic acid, pyroglutamic acid, pyruvate, sebacic acid, suberic acid, succinate,  $\alpha$ -ketoglutarate acid, caprylic acid, capric acid, orotic acid, isocitrate, phosphoenol pyruvate and D4-succinate, methoxylaminehydrochloride, pyridine, N-methyl-N-(trimethylsilyl)trifluoroacetamide (MSTFA) were purchased from Sigma (St Louis, MO, USA,  $\geq 99\%$  purity). Acetone, acetonitrile and methanol (chromatographic grade) were purchased from Thermo Fisher Scientific Company (Waltham, MA, USA). Deionized water (18 M $\Omega$  cm) from aMillipore Milli-Q water purification system was used to prepare the solutions. Stock solutions of the 24 organic acids including D4-succinate were prepared at 1mg/mL in methanol. Stock solutions of 3 organic acids (isocitrate, orotic acid, phosphoenol pyruvate) were prepared at 1mg/mL in deionized water.

## Supplementary Figure

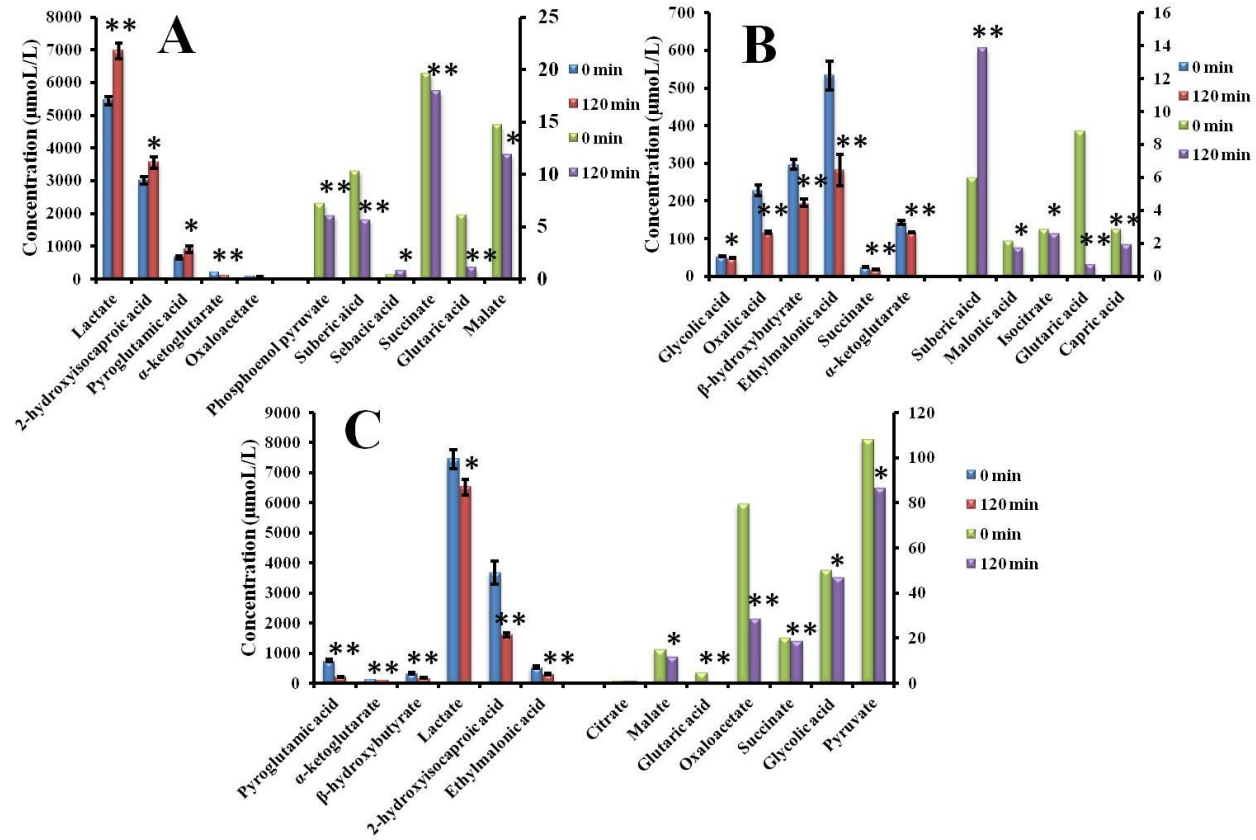

**Figure S1.** The concentration of significant metabolites from fasting to 2-h postprandial during the HB (A), WR (B) and GL (C) loads in the IFG group. Data are mean  $\pm$  SEM. \*  $p < 0.05$ , \*\*  $p < 0.001$ , 2h after glucose loading compared with fasting state

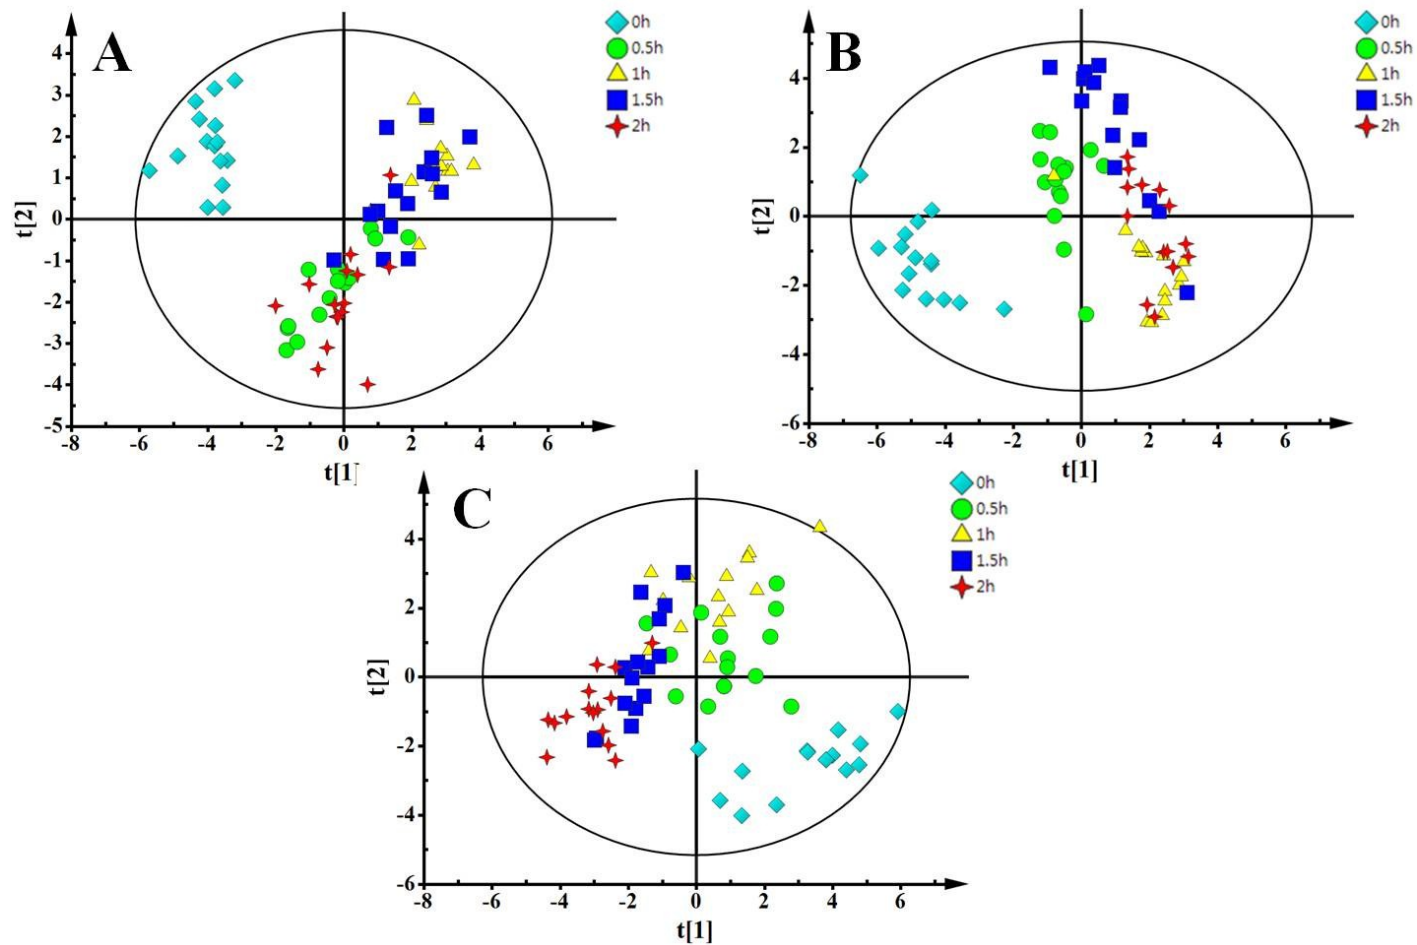

**Figure S2.** Scores plots from PCA model classifying the time points after the intake of HB (A), WR (B) and GL (C) loads in the IFG group. (A,  $R^2X = 0.354$ ,  $Q^2 = 0.176$ ; B,  $R^2X = 0.434$ ,  $Q^2 = 0.281$ ; C,  $R^2X = 0.496$ ,  $Q^2 = 0.247$ ).

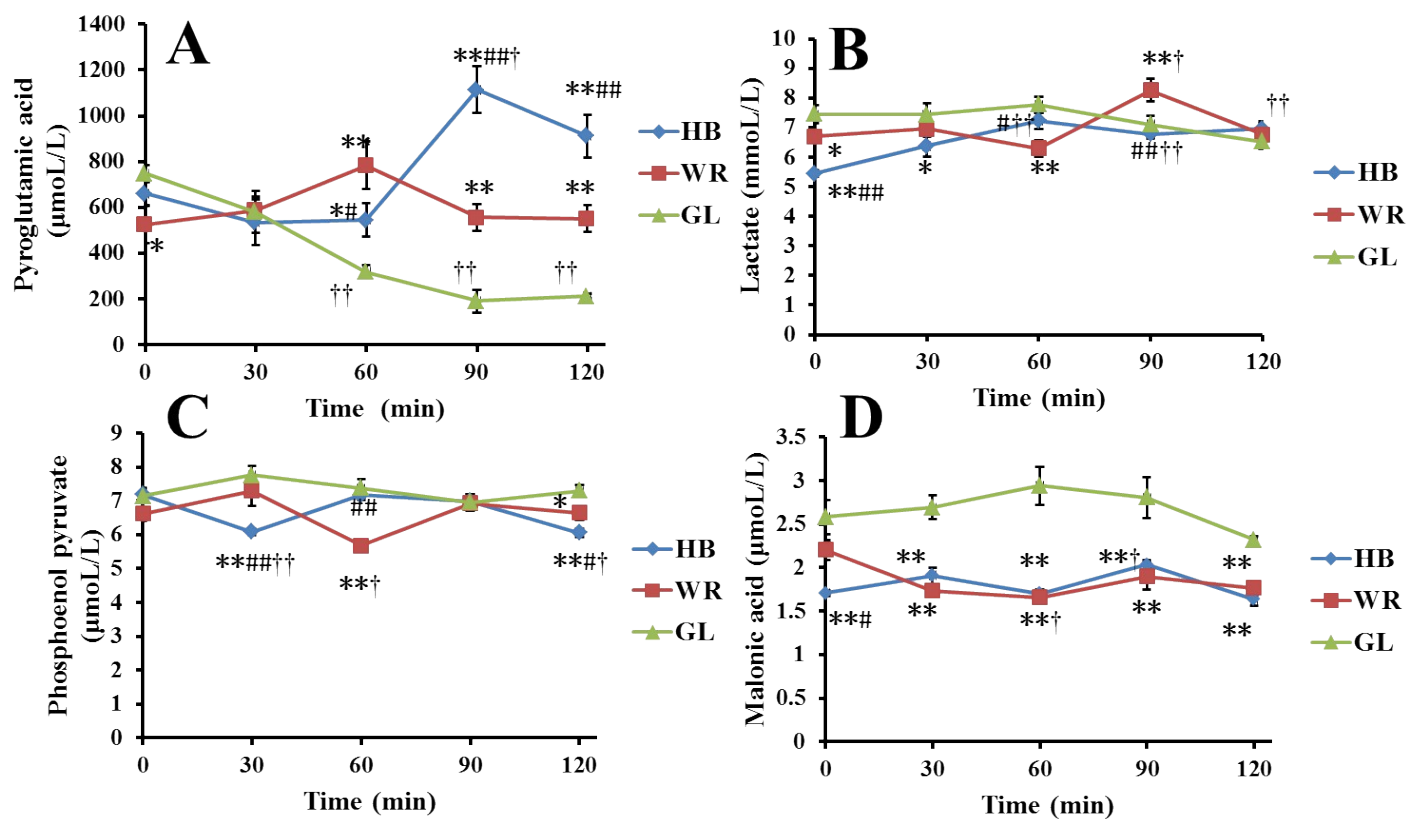

**Figure S3.** The changes in serum pyroglutamic acid (A), lactate (B), phosphoenol pyruvate (C) and malonic acid (D) during three test loads. GL: glucose load; WR, white rice; HB, highland barley. \*  $p < 0.05$ , \*\*  $p < 0.01$ , HB or WR vs. GL at the same time point using repeated measures ANOVA analysis with a LSD post hoc test. #  $p < 0.05$ , ##  $p < 0.01$ , HB vs. WR at the same time point using repeated measures ANOVA analysis with LSD post hoc test. †  $p < 0.05$ , ††  $p < 0.01$ , compared with the baseline in the same treated group using multiple comparisons analysis with LSD post hoc test. Data are mean  $\pm$  SEM.

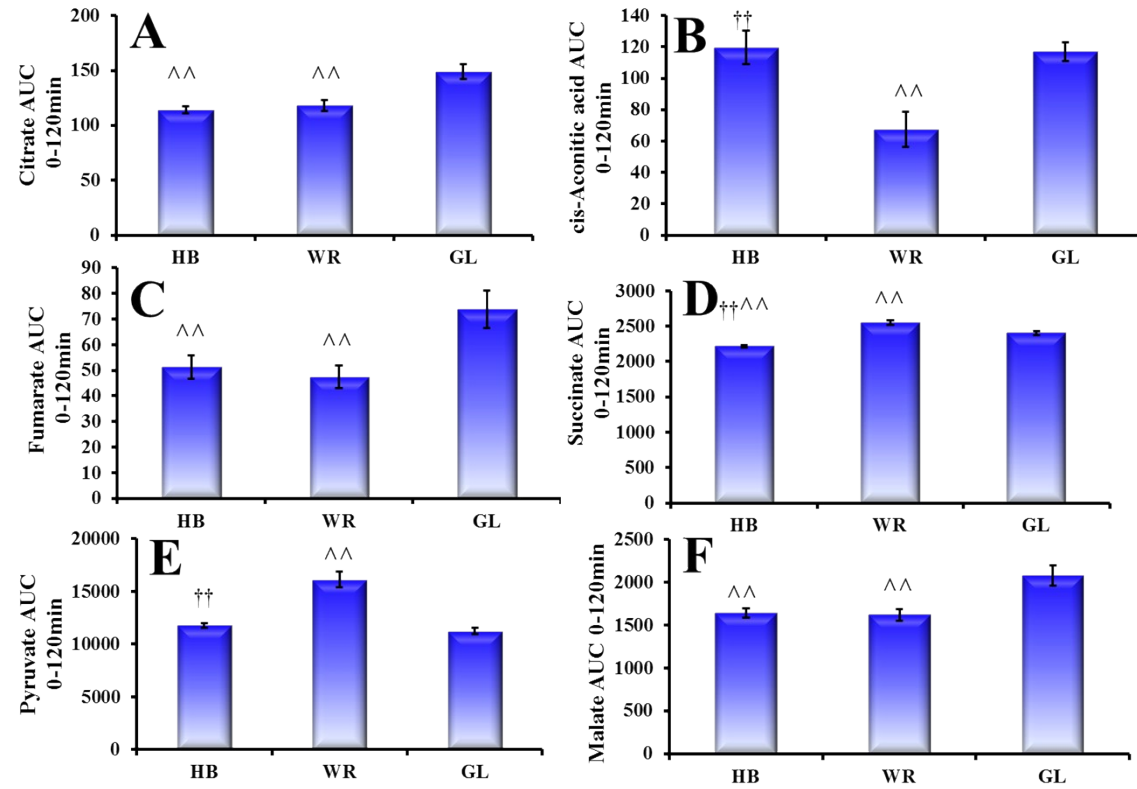

**Figure S4.** The AUC of serum citrate (A), cis-Aconitic acid (B), fumarate (C), succinate (D), pyruvate (E) and malate (F) between 0 and 120 min of different test loads. GL: glucose load; WR, white rice; HB, highland barley. ^ p < 0.05, ^^ p < 0.01, HB or WR compared with GL using one-way ANOVA analysis with LSD post hoc test. † p < 0.05, †† p < 0.01, HB compared with WR using one-way ANOVA analysis with LSD post hoc test. Data are mean  $\pm$  SEM.

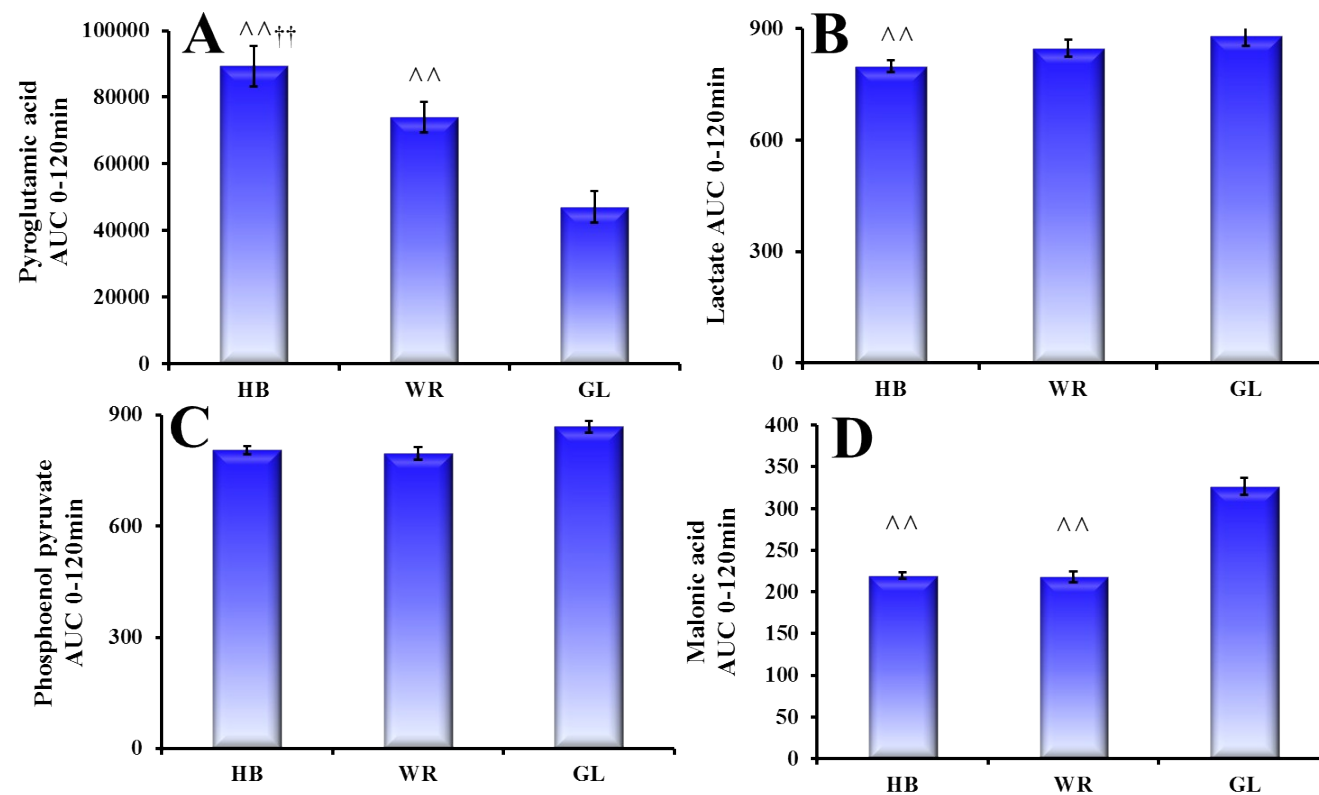

**Figure S5.** The AUC of serum pyroglutamic acid (A), lactate (B), phosphoenol pyruvate (C), malonic acid (D) between 0 and 120 min of different test loads. GL: glucose load; WR, white rice; HB, highland barley. ^ p < 0.05, ^^ p < 0.01, HB or WR compared with GL using one-way ANOVA analysis with LSD post hoc test. † p < 0.05, †† p < 0.01, HB compared with WR using one-way ANOVA analysis with LSD post hoc test. Data are mean ± SEM.
